# Supplementary material
Source: Royal Society of Chemistry journal article supplement (doi:10.1039/d6cc01217e)
Supplement: d6cc01217e1.pdf [file d6cc01217e1.pdf]

# Rod-shaped bismuth oxyiodide as a novel anode material for sodium-ion batteries

Jiaju Lu<sup>ab</sup>, Weiya Tian<sup>ab</sup>, Xiaoling Wang<sup>ab</sup>, Zheng Xu<sup>ab</sup>, Tengfei Li<sup>ab</sup>, Junxian Hu<sup>\*ab</sup>,  
Puqiang He<sup>\*c</sup> and Yaochun Yao<sup>\*ab</sup>

*<sup>a</sup>National Engineering Research Center of Vacuum Metallurgy, Kunming, China*

*<sup>b</sup>Faculty of Metallurgy and Energy Engineering, Kunming University of Science and  
Technology, Kunming, China*

*<sup>c</sup>Xinjiang Production & Construction Corps Key Laboratory of Green and Intelligent  
Development and Efficient Utilization of Strategic Mineral Resources, Xinjiang  
University of Technology, Hotan, China*

**Correspondence:** Junxian Hu (hujunxian@kust.edu.cn)

Puqiang He (270905839@qq.com)

Yaochun Yao (yaochun9796@163.com)

## Experimental section

### 1. Material Preparation

First, 0.97 g of  $\text{Bi}(\text{NO}_3)_3 \cdot 5\text{H}_2\text{O}$  was weighed and dissolved in 60 mL of deionized water, and the mixture was stirred for 30 minutes. Then, 30 mL of 1.5 mol/L NaOH solution was added and stirred to form a mixture. Next, 0.996 g of KI was weighed and dissolved in 30 mL of deionized water, and the mixture was stirred until completely dissolved. The KI solution was then slowly added to the mixture and stirred for 60 minutes. The mixture was transferred to a 200 mL high-pressure reactor and reacted at 180 °C for 24 hours. Finally, it was dried in an oven at 60 °C for 12 hours to obtain

B<sub>5</sub>O<sub>7</sub>I.

## 2 Material Characterizations

The morphological characteristics of B<sub>5</sub>O<sub>7</sub>I was detected by ZEISS Sigma 300 SEM. The detailed structures and elemental distributions were characterized using a JEM-1400 flash lamp and a JEOL 2100 F mission electron microscope (TEM, 200 kV). XRD tests were conducted using Cu-K $\alpha$  rays on a Rigaku Miniflex 600 diffractometer. XPS tests were completed on the Thermo Scientific K-Alpha+ system.

## 3 Electrochemical Measurements

After grinding the electrode material, Super P and polyvinylidene fluoride (PVDF) in a mass ratio of 7:2:1, N-methyl pyrrolidine (NMP) was added to form a uniform slurry, which was then coated onto the surface of the copper foil. A B<sub>5</sub>O<sub>7</sub>I electrode with a diameter of 10 mm and a loading capacity of approximately 2.5 mg cm<sup>-2</sup> was obtained. Then, the electrodes were assembled into coin cells (CR 2025) using glass fiber (Whatman GF/D) membranes and electrolyte (1 M NaPF<sub>6</sub> in DME) in an argon-filled glove box (with O<sub>2</sub> and H<sub>2</sub>O content below 0.1 ppm). Electrolyte amount: For each CR2025 coin cell, 120  $\mu$ L of 1 M NaPF<sub>6</sub> in DME electrolyte was used. Cyclic voltammogram (CV) measurements were carried out using an IviumStat Vertex. One. EIS electrochemical workstation at different scanning rates. The galvanostatic charge-discharge (GCD) curves were recorded at different current densities using the LAND-CT 3002A test system.

GITT was investigated with a pulse current of 200 mA g<sup>-1</sup> for 20 min, followed by a rest interval for 40 min. The following equation is applied to calculate the diffusion

coefficient:

$$D_K = \frac{4}{\pi} \left( \frac{m_B V_M}{M_B S} \right) \left( \frac{\Delta E_S}{\Delta E_\tau} \right)^2$$

where  $\tau$  is the constant current pulse duration,  $m_B$ ,  $M_B$ , and  $V_M$  are the mass, molar mass, and molar volume of the active material,  $S$  is the electrode/electrolyte contact area, and  $\Delta E_S$  and  $\Delta E_\tau$  are the steady-state voltage change and the voltage change during the pulse, respectively.

**Table 1.** Element composition test.

| Element | Content (%) |
|---------|-------------|
| Bi      | 81.47%      |
| O       | 8.8%        |

$$I(\text{wt}\%) = 1 - 81.47\% - 8.8\% = 9.73$$

$$Bi:O:I = \frac{81.47\%}{209} : \frac{8.8\%}{16} : \frac{9.73\%}{126.9} = 5.08:7.17:1$$

Theoretical content of each element in  $Bi_5O_7I$

$$Bi(\text{wt}\%) = \frac{5 \times M_{Bi}}{M_{Bi_5O_7I}} = \frac{5 \times 209}{1283.9} = 81.39\%$$

$$O(\text{wt}\%) = \frac{7 \times M_O}{M_{Bi_5O_7I}} = \frac{7 \times 16}{1283.9} = 8.72\%$$

$$I(\text{wt}\%) = \frac{M_I}{M_{Bi_5O_7I}} = \frac{126.9}{1283.9} = 9.89\%$$

Theoretical content of each element in  $BiOI$

$$Bi(\text{wt}\%) = \frac{M_{Bi}}{M_{BiOI}} = \frac{209}{351.9} = 59.39\%$$

$$O(\text{wt}\%) = \frac{M_O}{M_{BiOI}} = \frac{16}{351.9} = 4.55\%$$

$$I(\text{wt}\%) = \frac{M_I}{M_{\text{BiOI}}} = \frac{126.9}{351.9} = 36.06\%$$

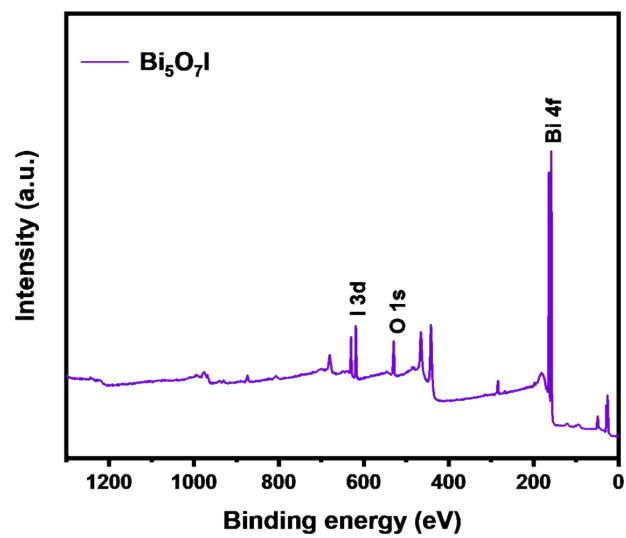

Fig. S1 Total XPS graph of  $\text{Bi}_5\text{O}_7\text{I}$  sample.

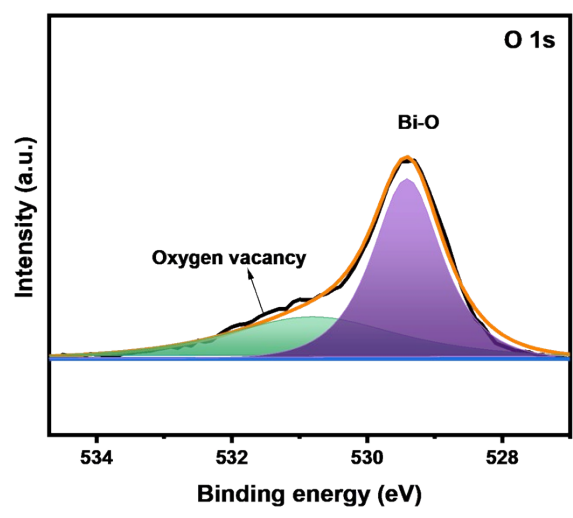

Fig. S2 O 1s XPS spectra of Bi<sub>5</sub>O<sub>7</sub>I sample.

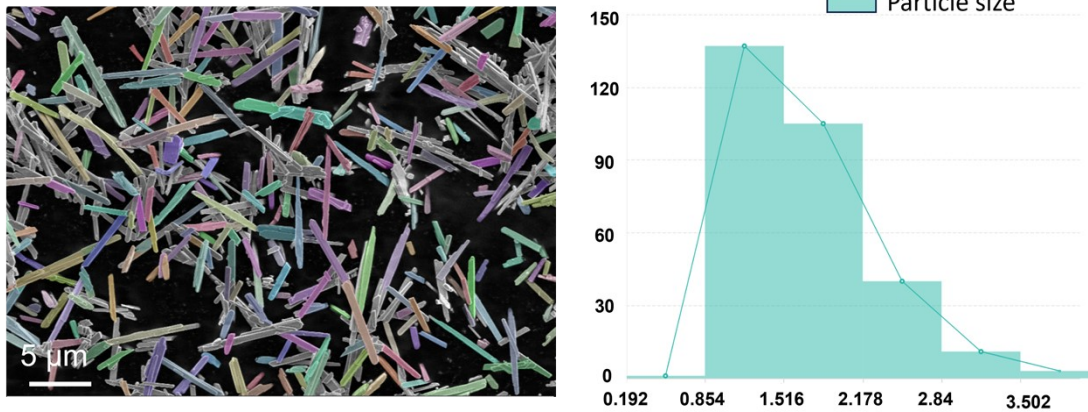

**Fig. S3** Statistical size distribution histogram of  $\text{Bi}_5\text{O}_7\text{I}$  microrods.

**Table S2.** Particle size data statistics table.

| X-axis - Particle size range | Y-axis - Number of Particles |
|------------------------------|------------------------------|
| [0.192,0.854)                | 1                            |
| [0.854,1.516)                | 137                          |
| [1.516,2.178)                | 105                          |
| [2.178,2.84)                 | 40                           |
| [2.84,3.502)                 | 11                           |
| [3.502,4.164]                | 3                            |
| /                            | 297                          |

**Table S3.** Particle size information.

| Average particle size | Particle size standard deviation |
|-----------------------|----------------------------------|
| 1.694 $\mu\text{m}$   | 0.563 $\mu\text{m}$              |

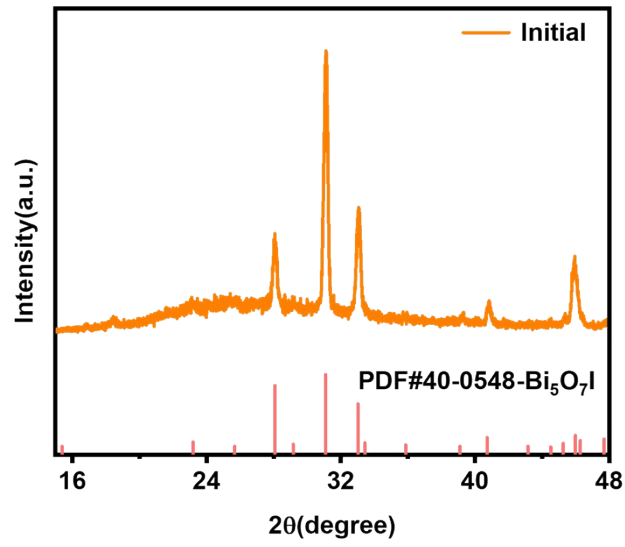

**Fig. S4** The in situ XRD pattern of the  $\text{Bi}_5\text{O}_7\text{I}$  electrode at the initial stage.

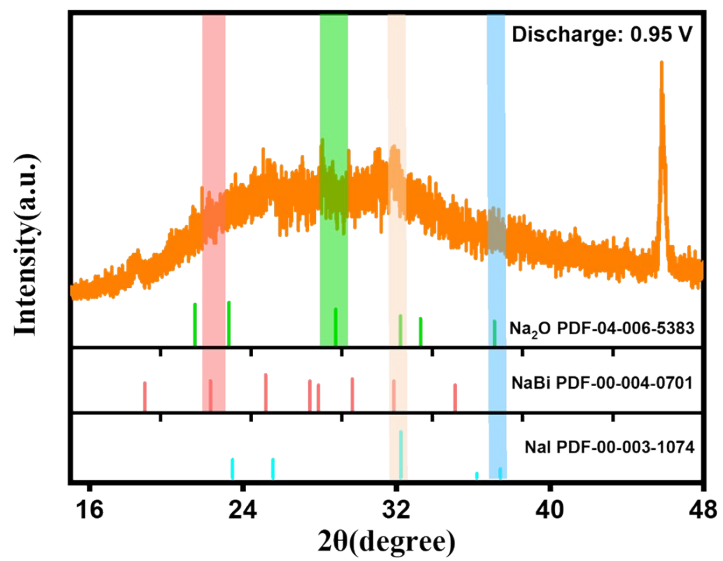

**Fig. S5** The in situ XRD pattern of the  $\text{Bi}_5\text{O}_7\text{I}$  electrode when the discharge voltage reached 0.95V.

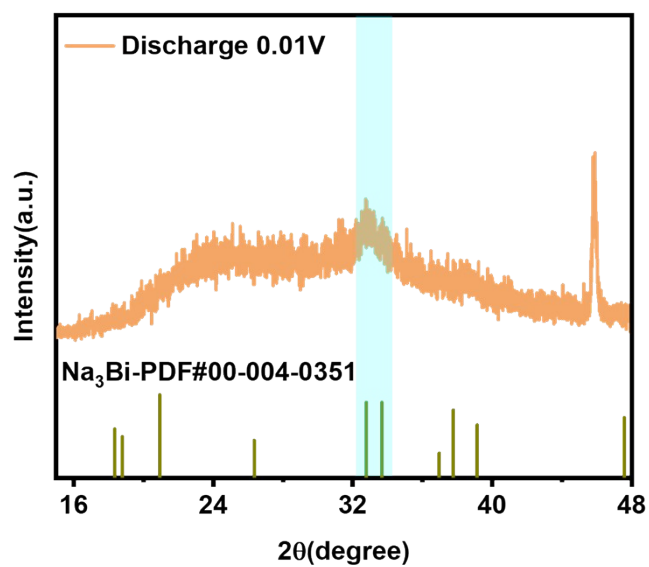

**Fig. S6** The in situ XRD pattern of the  $\text{Bi}_5\text{O}_7\text{I}$  electrode when the discharge voltage reached 0.01V.

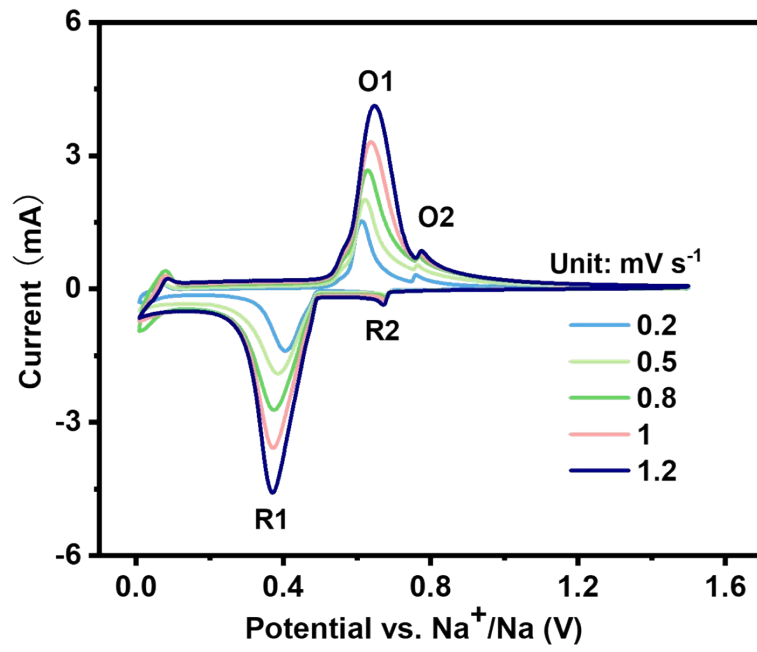

Fig. S7 CV curves of  $\text{Bi}_5\text{O}_7\text{I}$  electrode at 0.2 to 1.2  $\text{mV s}^{-1}$ .

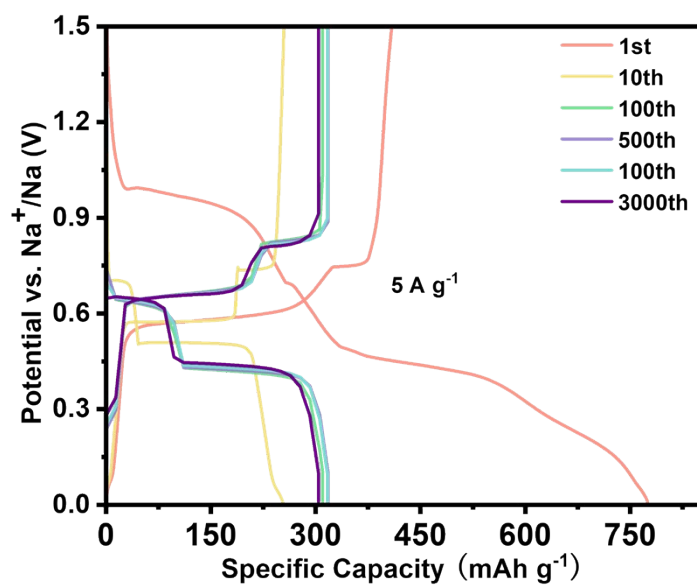

Fig. S8 Discharge/charge profiles of  $\text{Bi}_5\text{O}_7\text{I}$  electrode at  $5 \text{ A g}^{-1}$ .

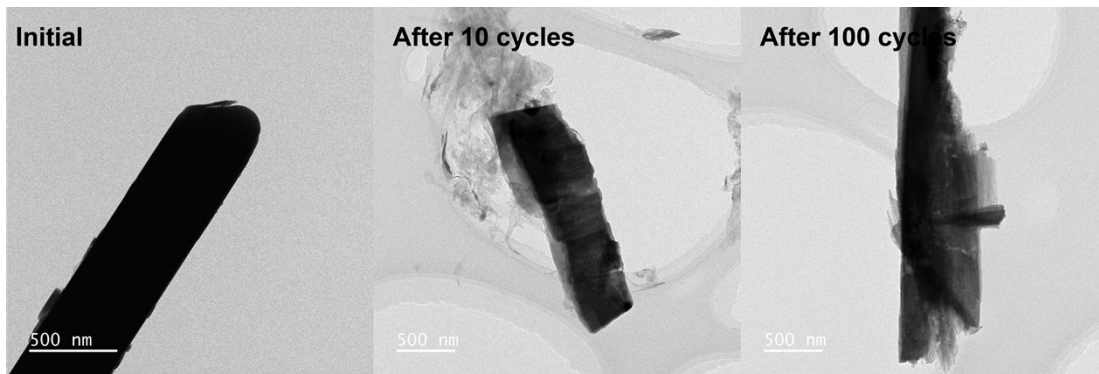

**Fig. S9** TEM images of the Bi<sub>5</sub>O<sub>7</sub>I electrode under different number of cycles.

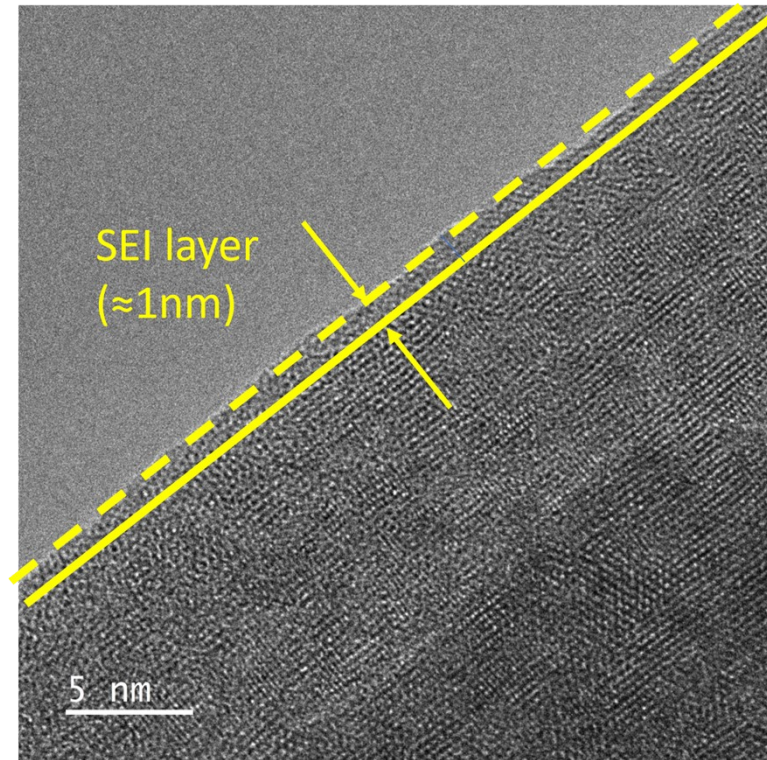

**Fig. S10** The SEI of  $\text{Bi}_5\text{O}_7\text{I}$  electrode.

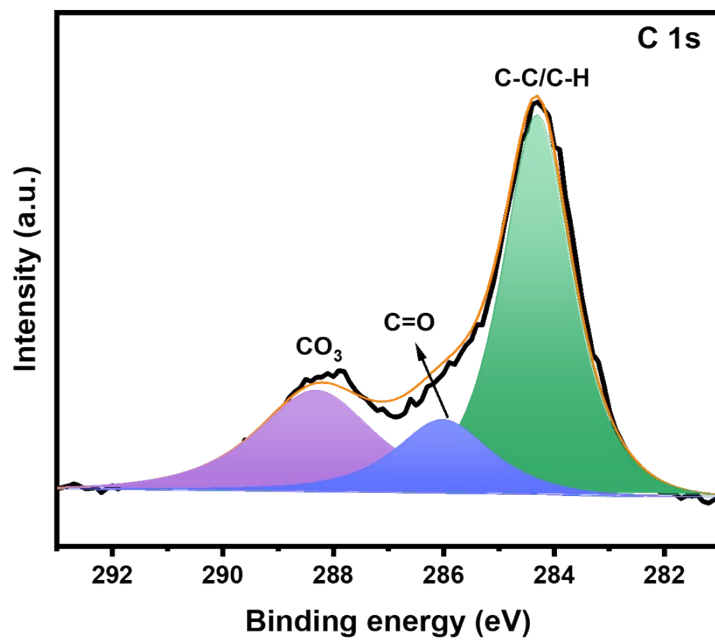

Fig. S11 C 1s XPS of Bi<sub>5</sub>O<sub>7</sub>I electrode.

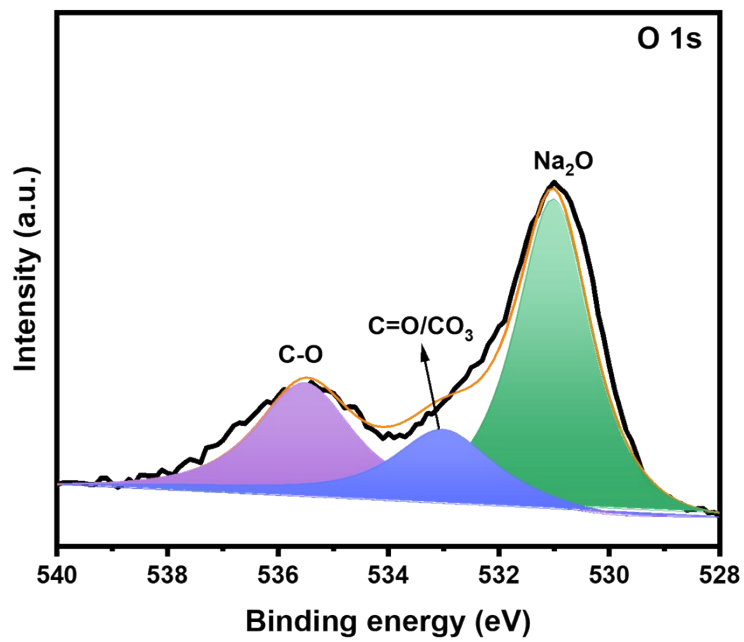

Fig. S12 O 1s XPS of Bi<sub>5</sub>O<sub>7</sub>I electrode.

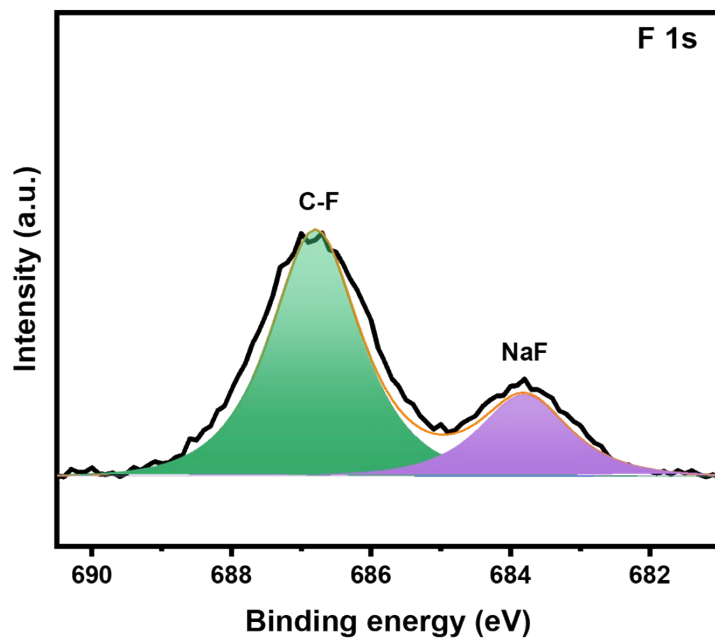

**Fig. S13 F 1s XPS of Bi<sub>5</sub>O<sub>7</sub>I electrode.**

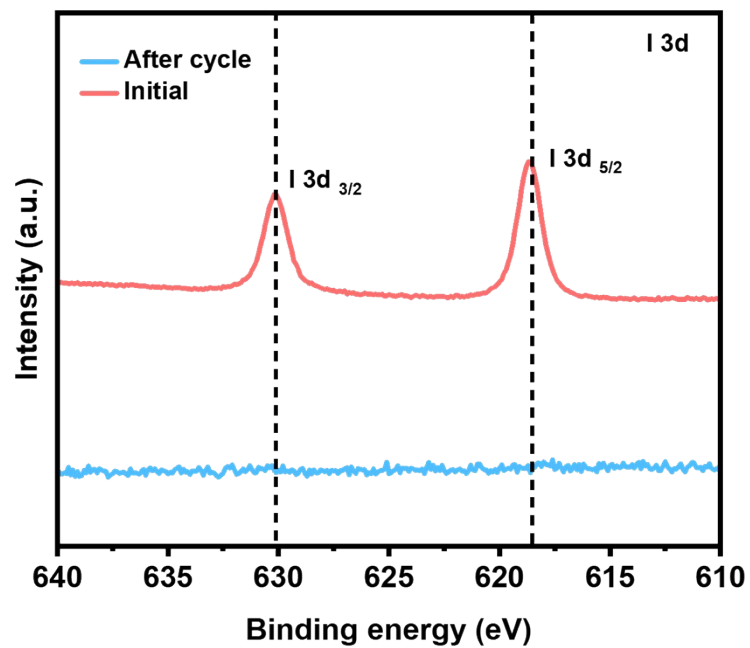

Fig. S14 I 3d XPS of Bi<sub>5</sub>O<sub>7</sub>I electrode.

**Table S4 Comparison of Bi<sub>5</sub>O<sub>7</sub>I electrodes with other alloy anodes in recent years.**

| <b>Materials</b>                                               | <b>Specific capacity<br/>(mAh/g)</b> | <b>Cycle</b> | <b>Current<br/>density (A/g)</b> | <b>Ref</b>       |
|----------------------------------------------------------------|--------------------------------------|--------------|----------------------------------|------------------|
| <b>Bi<sub>5</sub>O<sub>7</sub>I</b>                            | <b>292.6</b>                         | <b>3000</b>  | <b>5</b>                         | <b>This work</b> |
| <b>UTP BiOCl NSs</b>                                           | <b>~200</b>                          | <b>3000</b>  | <b>5</b>                         | <b>[1]</b>       |
| <b>Bi<sub>2</sub>Se<sub>3</sub>@rGO@NC</b>                     | <b>94.0</b>                          | <b>1000</b>  | <b>0.2</b>                       | <b>[2]</b>       |
| <b>Bi<sub>2</sub>S<sub>3</sub>/Sb<sub>2</sub>S<sub>3</sub></b> | <b>369.4</b>                         | <b>500</b>   | <b>1</b>                         | <b>[3]</b>       |
| <b>Bi<sub>2</sub>S<sub>3-x</sub>Se<sub>x</sub>@rGO</b>         | <b>701</b>                           | <b>100</b>   | <b>0.1</b>                       | <b>[4]</b>       |
| <b>Bi<sub>2</sub>Se<sub>3</sub>@NC</b>                         | <b>238</b>                           | <b>500</b>   | <b>5</b>                         | <b>[5]</b>       |

## References

- [1] S.-L. Wei, Y.-L. Yang, X.-L. Shi, Y. Sun, J.-G. Chen, X.-F. Tian, Y.-T. Wu, Z.-G. Chen, *Chem. Eng. J.*, 2024, 489, 151346.
- [2] S. Chong, L. Yuan, S. Qiao, M. Ma, T. Li, X.L. Huang, Q. Zhou, Y. Wang, W. Huang, *Sci. China Mater.* 2023, 66, 2641-2651.
- [3] Y. Dong, B. Murugesan, W. Lin, C. Wang, J. Dai, W. Li, Q. Ma, X. Yang, Y. Cai, *Ionics*, 2024, 30, 4043-4053.
- [4] M. Han, Y. Xi, S. Luan, J. Zhou, F. Gao, *Mater. Chem. Phys.*, 2022, 292, 126806.
- [5] X. Liu, S. Zhang, Z. Duan, X. Guo, Y. Liu, X. Zheng, Q. Fan, Q. Kong, J. Zhang, *J. Power Sources*, 2025, 649, 237471.
